# Supplementary material for: Comparison of radiation parametrizations within the HARMONIE–AROME NWP model
Source: Copernicus journal article supplement (doi:10.5194/asr-15-81-2018), 2018-05-22
Supplement: Supplementary file 1 [file asr-15-81-2018-supplement.zip]

Archive with 6 entries (6 files):
- picked-1hobs.zip
- picked-ecfc.zip
- picked-acfc.zip
- asr-15-81-2018-supplement-title-page.pdf
- data.txt
- picked-hlfc.zip
