# Supplementary material for: Comparison of radiation parametrizations within the HARMONIE–AROME NWP model
Source: Copernicus journal article supplement (doi:10.5194/asr-15-81-2018), 2018-05-22
Supplement: Supplementary file 1 [file asr-15-81-2018-supplement.zip › asr-15-81-2018-supplement-title-page.pdf]

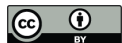

*Supplement of*

## **Comparison of radiation parametrizations within the HARMONIE–AROME NWP model**

**Laura Rontu and Anders V. Lindfors**

*Correspondence to:* Laura Rontu ([laura.rontu@fmi.fi](mailto:laura.rontu@fmi.fi))

- [asr-15-81-2018-supplement-title-page.pdf](#)
- [data.txt](#)
- [picked-1hobs.zip](#)
- [picked-acfc.zip](#)
- [picked-ecfc.zip](#)
- [picked-hlfc.zip](#)

The copyright of individual parts of the supplement might differ from the CC BY 4.0 License.
