# Supplementary material for: Comparison of radiation parametrizations within the HARMONIE–AROME NWP model
Source: Copernicus journal article supplement (doi:10.5194/asr-15-81-2018), 2018-05-22
Supplement: Supplementary file 1 [file asr-15-81-2018-supplement.zip › data.txt]

Attached data files:

picked-1hobs.zip

- contains files for each station: e.g. g117_kauhaj+1hobs.dat etc

- picked from the FMI climate data base hourly global radiation observations of all stations

- format: date as yyyymmddhh00      /  SWDS in Wm-2

201606010100        0.
201606010200       13.
201606010300       71.
201606010400      160.
201606010500      265.
201606010600      378.


picked-acfc.zip	40rbfi_acgp/  acraneb									
picked-ecfc.zip 40rbfi_ecgp/  ifsradia
picked-hlfc.zip 40rbfi_hlgp/  hlradia

- three directories contain files for each station: e.g. 40rbfi_hlgp/g117_utsjok+003

- picked from nearest gridpoint global radiation observations of all stations

- format: valid date as yyyymmddhh / longitude and latitude / gribcode for SWDS /   accumulated during the forecast (e.g. +003h) SWDS in Jm-2
          

2017050103    27.007  69.756  g117g105g000           0.726199E+05
2017050106    27.007  69.756  g117g105g000           0.264230E+07
2017050109    27.007  69.756  g117g105g000           0.244850E+07
2017050112    27.007  69.756  g117g105g000           0.398083E+07
2017050115    27.007  69.756  g117g105g000           0.448543E+07


Stations:

  100908  59.77909  21.37479 Parai
  100968  60.32670  24.95675 Vanta
  101004  60.20307  24.96131 Helsi
  101104  60.81401  23.49761 Jokio
  101339  62.39758  25.67087 Jyväs
  101756  64.11197  28.33639 Sotka
  101932  67.36663  26.62901 Sodan
  102035  69.75637  27.00678 Utsjo
  100934  60.38690  22.55183 Kaari
  100949  60.45439  22.17870 Turku
  101068  61.26002  22.22752 Kokem
  101185  61.26521  25.52021 Asikk
  101246  61.03879  28.56395 Lappe
  101254  61.44467  29.46108 Parik
  101289  62.41345  22.18372 Kauha
  101310  62.32783  23.54228 Virra
  101418  61.89230  27.88528 Juva 
  101486  62.93808  22.48878 Seinä
  101572  63.14343  27.31317 Kuopi
  101603  63.37806  28.66166 Rauta
  101651  62.76966  30.97533 Iloma
  101689  63.82136  24.16325 Tohol
  101705  63.73589  25.70573 Pyhäj
  101787  64.68421  25.08919 Siika
  101794  65.00639  25.39328 Oulu 
  101920  66.56249  25.82208 Rovan
  101933  66.57941  26.01098 Rovan
  101983  67.97332  24.11589 Muoni
